# Supplementary material
Source: ML conference proceedings conference paper supplement (https://openreview.net/forum?id=bidTZROu2y)

## Training set

## Generalization over time

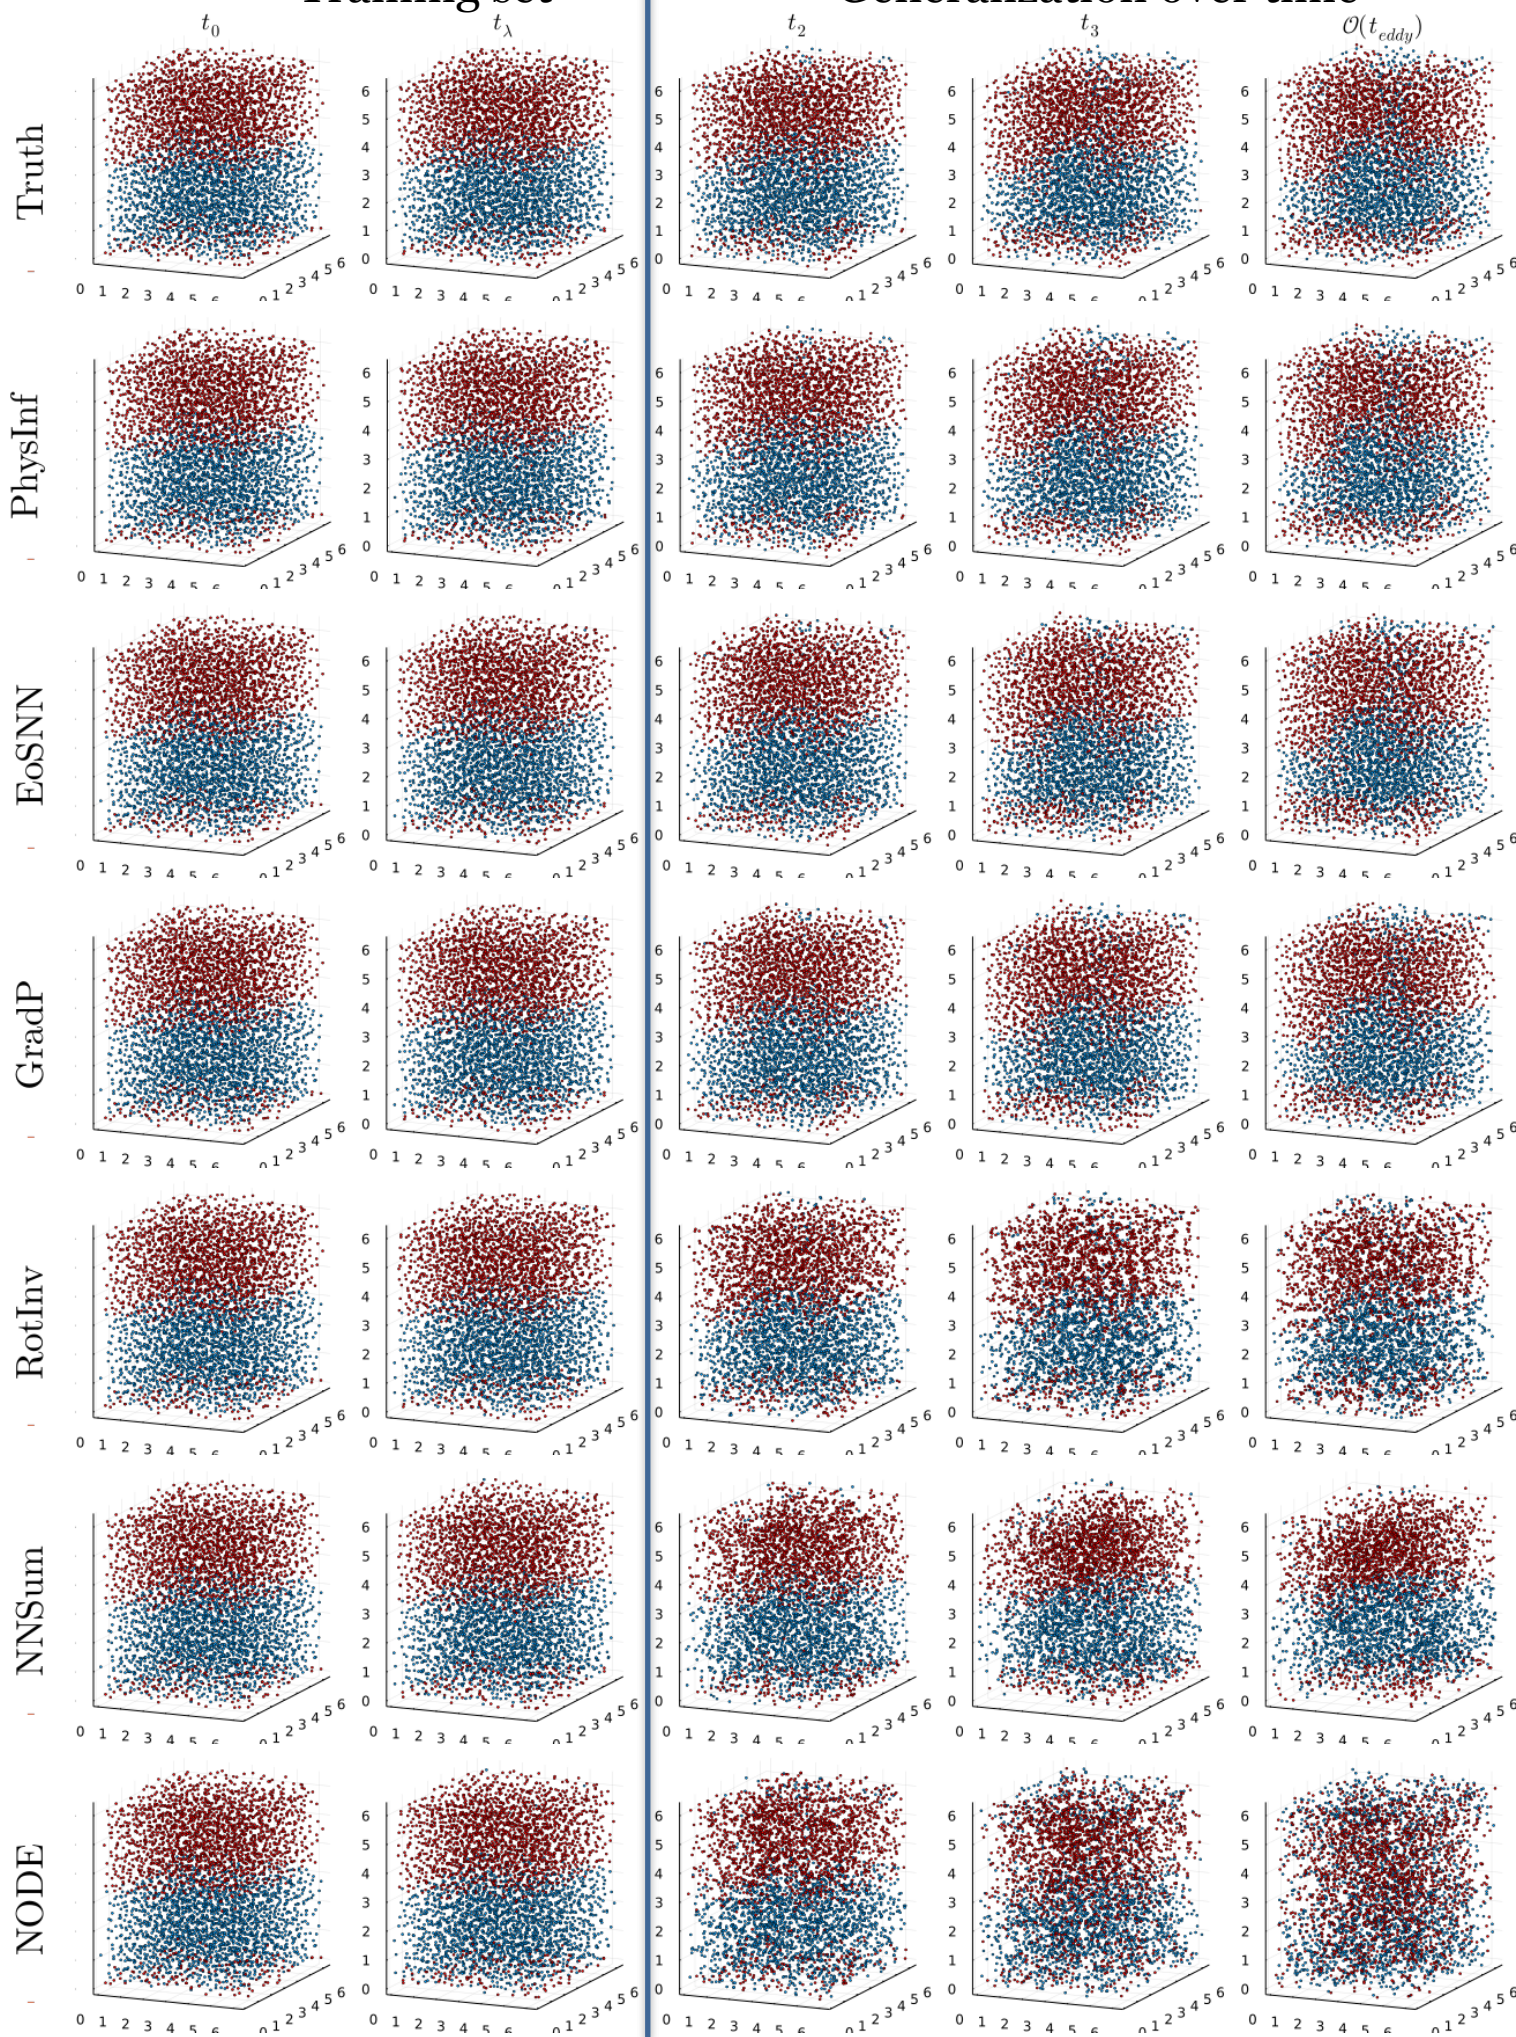

Supplement: supplementary_material [file attachment]
